# Supplementary material
Source: publisher figshare collection journal article supplement (https://gsajournals.figshare.com/ndownloader/files/14021528)
Supplement: Supplementary file 1 [file 14021528]

## Sheet: Hmmer vs. Blast Results
Supplementary Table 2: Comparison of HMMER matches to Pfam AMPs and BLAST results to DADP
Species Name	Number of Total AMP Hits from Hmmer	Number of Frog AMPs from Hmmer (# total transcripts, # unique AMPs)	Number of Frog AMPs from Blast (# total transcripts, # unique AMPs)
	(# total transcripts, # unique AMPs)
Mantella betsileo	0	0	0
Polypedates megacephalus	24, 15	4, 3	15, 7
Rhacophorus dennysi	34, 12	8, 4	25, 11
Fejervarya limnocharis	31, 13	4, 3	4, 1
Paa boulengeri	38, 17	7, 4	9, 3
Pelophylax nigromaculatus	31, 14	13, 5	48, 16
Odorrana margaretae	45, 11	14, 4	57, 37
Rana catesbeiana	7, 7	4, 4	11, 8
Agalychnis callidryas	22, 11	2, 1	9, 4
Craugastor fitzingeri	12, 7	2, 2	1, 1
Atelopus glyphus	20, 2	2, 2	2, 1
Xenopus laevis	53, 19	11, 3	14, 2
Bombina maxima	22, 15	7, 5	38, 13
